# Supplementary material
Source: Royal Society of Chemistry journal article supplement (doi:10.1039/d6an00345a)
Supplement: d6an00345a1.pdf [file d6an00345a1.pdf]

## Supplementary Information

### Enzyme-assisted Catalytic Hairpin Assembly based Aggregation-Induced Emission Assay for Trace miRNA-196a in Serum

Zihan Xu<sup>1</sup>, Yongda Lu<sup>3</sup>, Jieyu Yan<sup>2</sup>, Yan Wang<sup>3</sup>, Zhengjiang Wu<sup>2</sup>, Yifei Li<sup>2</sup>, Jiayin Zhang<sup>4</sup>, Kun Han<sup>1,2\*</sup>

<sup>1</sup> School of Biomedical Engineering (Suzhou), Division of Life Sciences and Medicine, University of Science and Technology of China, Hefei, 230026, China

<sup>2</sup> CAS Key Lab of Bio-Medical Diagnostics, Suzhou Institute of Biomedical Engineering and Technology, Chinese Academy of Science, Suzhou, 215163, China

<sup>3</sup> First Affiliated Hospital of Soochow University, Suzhou, 215006, China

<sup>4</sup> School of Food Science and Pharmaceutical Engineering, Nanjing Normal University, Nanjing, 210023, P. R. China

**\*Corresponding authors:**

Kun Han: [hank@sibet.ac.cn](mailto:hank@sibet.ac.cn)

**Keywords:** miRNA, enzyme-assisted catalytic hairpin assembly (eaCHA), aggregation-induced emission (AIE), Pancreatic cancer (PC)

## Supplementary materials

### Supplementary tables

**Table S1** The DNA sequences employed in this work

| Name       | Sequences (from 5'→3')                                               |
|------------|----------------------------------------------------------------------|
|            | Biotin-                                                              |
| Bio-H1     | TTTTTCCCAACAACATGAAACTACCTAGCTGAGGAGTAGTTTCAT<br>GTTACCAAC           |
| H2         | TGGTAACATGAAACTACTCCTCAGCTAGGTAGTTTCATGTTTGAG<br>GAGTAGTTTCATGTAAAAA |
|            | DBCO-                                                                |
| H3         | CACCAGCTAGTTTCATGTTACCACTTGCCTCTCTTCGTTGGTAAC<br>ATGAAACTACTCCTCA    |
| ZH3        | CACCAGCTAGTTTCATGTTACCACTTGCCTCTCTTC                                 |
| TS1        | TGAGGAGTAGTTTCATGTTACCAAC                                            |
| TS2        | DBCO-GGCAAGTGGTAACATTTTTTT                                           |
| miRNA-196a | UAGGUAGUUUCAUGUUGUUGGG                                               |
| miR-21     | UAGCUUAUCUGUCUGAUGUUGA                                               |
| miR-141    | UAACACUGUCUGGUAAAACCGU                                               |
| miR-199a   | ACAGUAGUCUGCACAUUGGUUA                                               |
| miR-155    | UUAAUGC UAAUCGUGAUAGGGGU                                             |
